# Supplementary material
Source: PubMed Central journal article supplement (PMC8960168)
Supplement: mmc1-suppl.pdf [file mmc1-suppl.pdf]

## **Molecular Docking study**

### **Experimental**

#### **Preparation of the collected compounds**

67 collected compounds were constructed into a 3D model using the builder interface of the MOE program. After checking their structures and the formal charges on atoms by 2D depiction, the following steps were conducted:

- The target compounds were subjected to a conformational search.
- All conformers were subjected to energy minimization, all the minimizations were performed with MOE until an RMSD gradient of  $0.05 \text{ kcal}\cdot\text{mol}^{-1}\text{\AA}^{-1}$  with MMFF94x force field and the partial charges were automatically calculated.
- The obtained database was then saved as Molecular Data Base (MDB) file to be used in the docking calculations.

#### **Preparation of the target protein**

The X-ray crystallographic structure of COVID-19 main protease in apo form (PDB ID: 6M03) was downloaded from the protein data bank in pdb format (<http://www.rcsb.org/>). The enzyme was prepared for docking study by:

- Removal unnecessary water molecules which are not involved in the binding.
- *Protonate 3D* protocol in MOE with default options.
- The main protease central binding site was defined for docking study through the key amino acids reported before.

#### **Docking of the collected compounds to the main protease binding site**

Docking of the target compounds database was done using MOE software. The following methodology was generally applied:

- The enzyme file was loaded and the Dock tool was initiated. The program specifications were adjusted to:
  - Selection of the essential amino acid residues as the main docking site.
  - Triangle matcher as the placement methodology to be used.
  - London dG as Scoring methodology to be used and was adjusted to its default values.
- The MDB file of the ligands to be docked was uploaded and dock calculations were run automatically. The attained poses were studied and the poses showed best ligand-enzyme interactions were chosen.
